# Supplementary material for: Construction of a liquid crystal biosensor based on Fe3O4 nano-signal amplification and its application in HCG detection
Source: Royal Society of Chemistry journal article supplement (doi:10.1039/d3ay01075a), 2023-01-01
Supplement: d3ay01075a1.pdf [file d3ay01075a1.pdf]

1

## Supplementary material for

### 2 Construction of Liquid Crystal Biosensor based on Fe<sub>3</sub>O<sub>4</sub> Nano- 3 signal Amplification and its Application in HCG Detection

4 Xue Wang,<sup>\*,1,2,3,4,5</sup> Yingying Sun,<sup>1,2,3,4,5</sup> Zhe Liu,<sup>1,2,3,4,5</sup> Weiwei Chen,<sup>1,2,3,4,5</sup> Tingting  
5 Meng,<sup>1,2,3,4,5</sup> Huanyuan Wang,<sup>\*,1,2,3,4,5</sup>

6 1. Institute of Land Engineering and Technology, Shaanxi Provincial Land  
7 Engineering Construction Group Co., Ltd., Xi'an, Shaanxi 710075

8 2. Shaanxi Provincial Land Engineering Construction Group Co., Ltd., Xi'an, Shaanxi  
9 710021

10 3. The Key Laboratory of Degeneration and Unutilized Land Improvement of the  
11 Ministry of Land and Resources, Xi'an, Shaanxi 710075

12 4. Shaanxi Engineering Research Center of Land Consolidation, Xi'an, Shaanxi  
13 710075

14 5. Land Engineering Technology Innovation Center, Ministry of Natural Resources,  
15 Xi'an, Shaanxi 710075

16 \*Corresponding Author: 657217216@qq.com; 181073033@qq.com

1 **1. Optimization of the content of DMOAP**

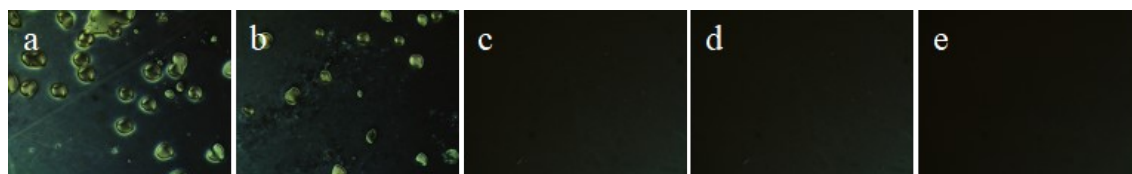

3 **Fig. S1** Optimization of optimum DMOAP content: (a) 1%, (b) 1.5%, (c) 2.0%, (d) 2.5%, (e) 3%.

4 **2. Optimization of APTES and GA addition**

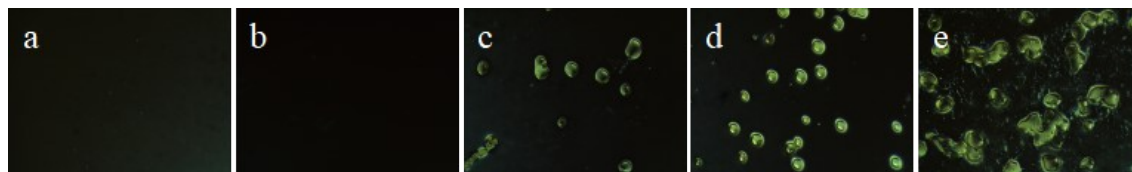

6 **Fig. S2** Optimization of optimum APTES content: (a) 2.0%, (b) 4.0%, (c) 6.0%, (d) 8.0%, (e)  
7 10.0%.

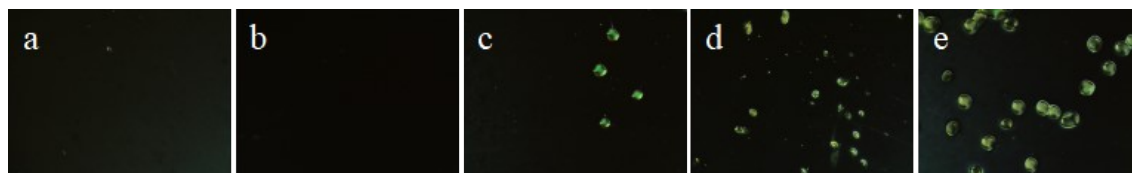

9 **Fig. S3** Optimization of optimum GA content: (a) 1.0%, (b) 1.5%, (c) 2.0%, (d) 2.5%, (e) 3.0%.

10 **3. Optimization of the concentration of  $\beta$ -hCG**

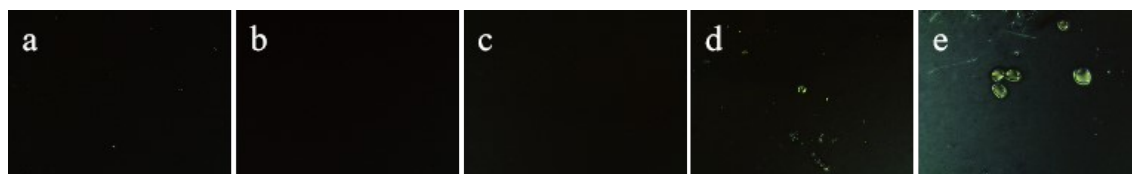

12 **Fig. S4** Optical imaging of LC cells prepared with different concentrations of  $\beta$ -hCG (a) 1.0, (b)  
13 10, (c) 50, (d) 100, (e) 200 mIU/mL.

#### 4. Optimization of detectable concentrations of Fe<sub>3</sub>O<sub>4</sub>-modified β-hCG

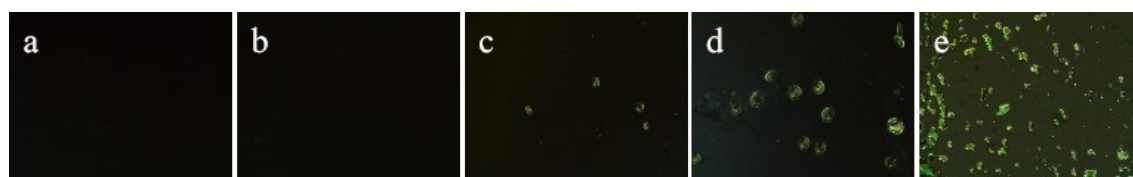

**Fig. S5** Optical imaging of LC cell prepared by different concentrations of Fe<sub>3</sub>O<sub>4</sub> nanospheres modified β-hCG: (a) 1.0, (b) 10, (c) 50, (d) 100, (e) 200 mIU/mL.

#### 5. Real sample

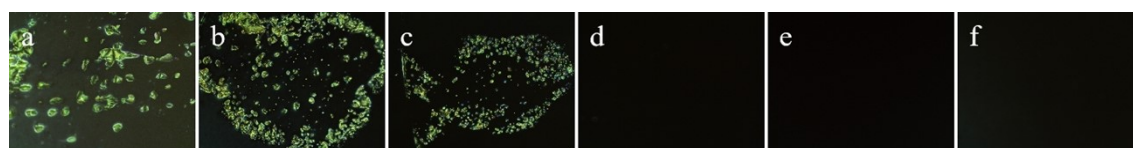

**Fig. S6** Analysis of the real sample of LC biosensors. (a-c) with HCG sample, (d-e) without HCG sample.

#### 6. Specificity analysis

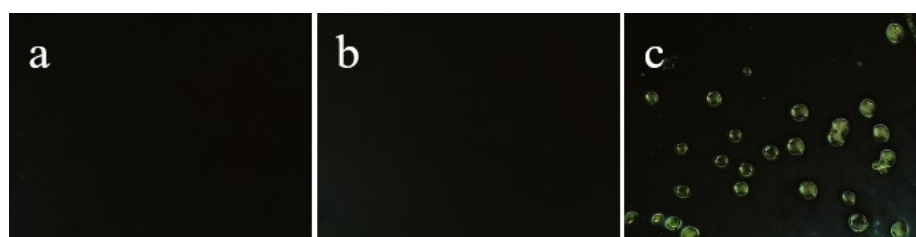

**Fig. S7** Analysis of the specificity of LC biosensors (a) LH, (b) FSH, (c) HCG.
